# Supplementary material
Source: publisher figshare collection journal article supplement (https://acs.figshare.com/ndownloader/files/4715479)
Supplement: Supplementary file 1 [file 4715479]

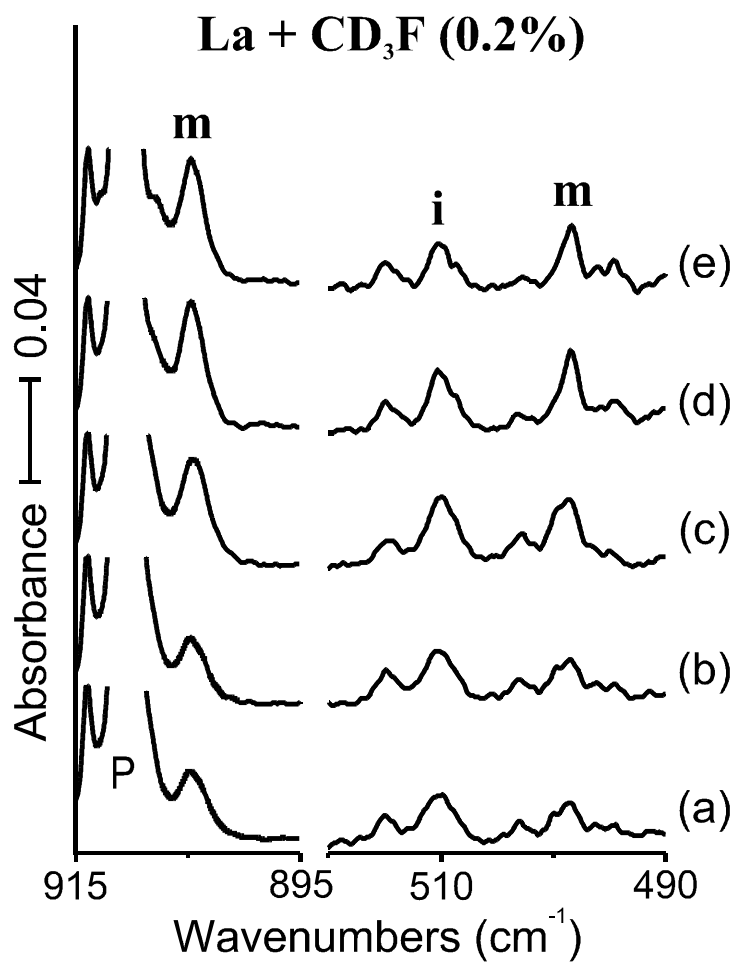

Figure S1. IR spectra in the regions of 915-895, and 520-490 cm<sup>-1</sup> for laser-ablated La atoms co-deposited with CD<sub>3</sub>F in excess argon at 8 K. (a) La + 0.2% CD<sub>3</sub>Cl in Ar co-deposited for 1 h. (b) After broad-band photolysis with a filter ( $\lambda > 420$  nm). (c) After broad-band photolysis with a filter ( $240 < \lambda < 380$  nm). (d) After annealing to 28 K. (e) After annealing to 32 K. **i** and **m** denote the product absorption groups. **P** indicates absorption by precursor.

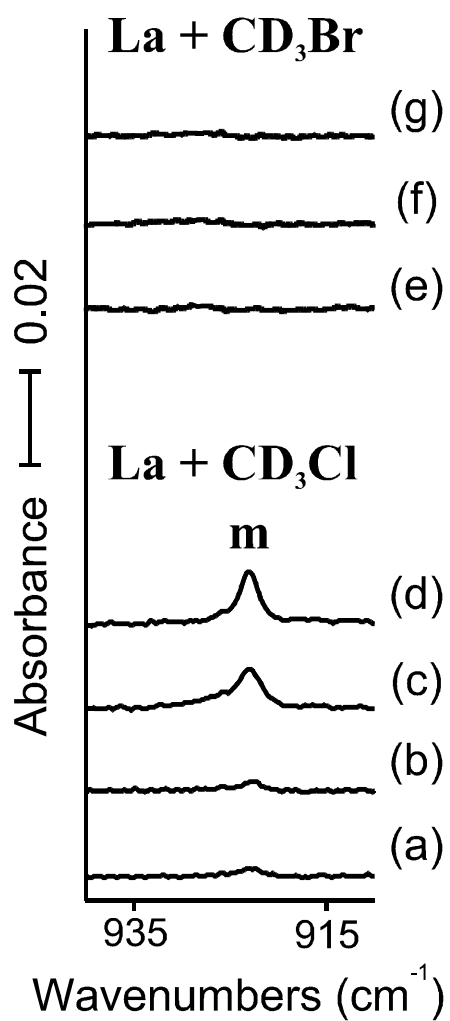

Figure S2. IR spectra in the regions of 940-910 cm<sup>-1</sup> for laser-ablated La atoms co-deposited with CD<sub>3</sub>Cl (a-d) and CD<sub>3</sub>Br (e-g) in excess argon at 8 K and their variation. (a) La + 0.2% CD<sub>3</sub>Cl in Ar co-deposited for 1 h. (b) After broad-band photolysis with a filter ( $\lambda > 420$  nm). (c) After broad-band photolysis with a filter ( $240 < \lambda < 380$  nm). (d) After annealing to 28 K. (e) La + 0.2% CD<sub>3</sub>Br in Ar co-deposited for 1 h. (f) After broad-band photolysis with a filter ( $\lambda > 420$  nm). (g) After broad-band photolysis with a filter ( $240 < \lambda < 380$  nm). **m** denotes the product absorption group.

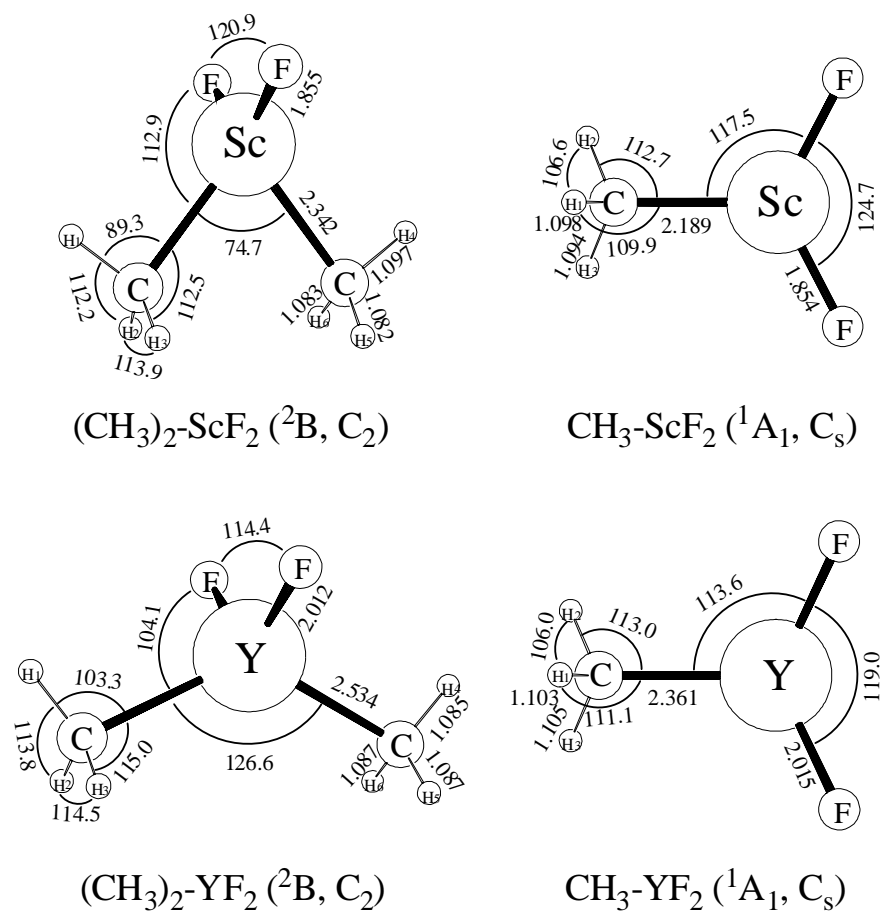

Figure S3. The optimized molecular structures of  $(\text{CH}_3)_2\text{MF}_2$  and  $\text{CH}_3\text{-MF}_2$  calculated using B3LYP and the 6-311++G(3df,3pd) basis set. The all electron basis is used for Sc, whereas the SDD pseudopotential and basis are used for Y. The bond lengths and angles are in Å and degree. The electronic states and molecular symmetry are shown below the structure. They might be responsible for the observed **h** absorptions.

Table S1: Harmonic Frequencies of CH<sub>3</sub>-ScF and CH<sub>3</sub>-YF in the Ground <sup>2</sup>A' Electronic States

Calculated with the B3LYP and BPW91 Density Functionals<sup>a</sup>

| Approximate Description     | CH <sub>3</sub> -ScF |      |        |      | CH <sub>3</sub> -YF |      |        |      |
|-----------------------------|----------------------|------|--------|------|---------------------|------|--------|------|
|                             | B3LYP                |      | BPW91  |      | B3LYP               |      | BPW91  |      |
|                             | Freq.                | Int. | Freq.  | Int. | Freq.               | Int. | Freq.  | Int. |
| A' CH <sub>3</sub> str.     | 3079.8               | 9    | 3039.8 | 7    | 3067.7              | 12   | 3027.6 | 10   |
| A' CH <sub>3</sub> str.     | 2974.8               | 6    | 2920.9 | 4    | 2963.9              | 11   | 2912.9 | 9    |
| A' CH <sub>3</sub> bend     | 1419.9               | 0    | 1369.4 | 0    | 1422.2              | 0    | 1374.1 | 0    |
| A' CH <sub>3</sub> deform   | 1139.0               | 11   | 1089.9 | 11   | 1141.7              | 15   | 1097.0 | 13   |
| A' Sc-X str.                | 667.8                | 171  | 663.2  | 148  | 592.4               | 110  | 588.9  | 100  |
| A' C-Sc str.                | 510.3                | 65   | 505.8  | 58   | 465.9               | 38   | 462.3  | 38   |
| A' CH <sub>3</sub> rock     | 414.8                | 21   | 399.9  | 17   | 397.6               | 15   | 389.6  | 12   |
| A' CScX bend                | 133.2                | 6    | 136.7  | 4    | 113.8               | 6    | 115.7  | 5    |
| A'' CH <sub>3</sub> str.    | 3038.7               | 7    | 2992.4 | 7    | 3022.9              | 8    | 2980.2 | 7    |
| A'' CH <sub>3</sub> bend    | 1430.1               | 10   | 1381.8 | 13   | 1431.9              | 10   | 1385.5 | 11   |
| A'' CH <sub>3</sub> rock    | 379.7                | 7    | 351.3  | 3    | 358.8               | 2    | 340.6  | 1    |
| A'' CH <sub>3</sub> distort | 4.2                  | 1    | 10.7   | 1    | 2.5                 | 0    | 15.0   | 0    |

<sup>a</sup>Frequencies and intensities computed with B3LYP or BPW91/6-311++G(3df, 3pd), and all electron basis is used for Sc. Frequencies and intensities are in cm<sup>-1</sup> and km/mol. Both CH<sub>3</sub>-ScF and CH<sub>3</sub>-YF have also a C<sub>s</sub> (planar) structure. The symmetry notations are based on the C<sub>s</sub> structure.

Table S2: Harmonic Frequencies of CH<sub>2</sub>-ScHF and CH<sub>2</sub>-YHF in the Doublet Ground Electronic States Calculated with the B3LYP and BPW91 Density Functionals<sup>a</sup>

| Approximate Description   | CH <sub>2</sub> -ScHF |      |        |      | CH <sub>2</sub> -YHF |      |        |      |
|---------------------------|-----------------------|------|--------|------|----------------------|------|--------|------|
|                           | B3LYP                 |      | BPW91  |      | B3LYP                |      | BPW91  |      |
|                           | Freq.                 | Int. | Freq.  | Int. | Freq.                | Int. | Freq.  | Int. |
| A' CH str.                | 3109.8                | 13   | 3052.5 | 14   | 3094.6               | 19   | 3040.2 | 19   |
| A' CH str.                | 3033.0                | 8    | 2970.6 | 10   | 3023.9               | 18   | 2965.0 | 20   |
| A' Sc-H str.              | 1551.3                | 511  | 1512.8 | 482  | 1445.5               | 494  | 1421.4 | 472  |
| A' CH <sub>2</sub> scis.  | 1369.2                | 2    | 1323.8 | 2    | 1375.1               | 3    | 1329.5 | 2    |
| A' Sc-X str.              | 699.3                 | 326  | 687.2  | 301  | 595.9                | 254  | 589.0  | 233  |
| A' C-Sc str.              | 572.1                 | 99   | 559.2  | 86   | 587.3                | 82   | 561.8  | 70   |
| A' CScH bend              | 492.6                 | 19   | 484.4  | 18   | 455.8                | 20   | 447.8  | 22   |
| A' CH <sub>2</sub> rock   | 375.0                 | 9    | 361.6  | 7    | 356.0                | 20   | 352.1  | 16   |
| A' CScX bend              | 145.1                 | 2    | 144.4  | 2    | 143.1                | 116  | 162.5  | 71   |
| A'' CH <sub>2</sub> wag   | 609.6                 | 82   | 575.7  | 76   | 507.3                | 131  | 499.8  | 121  |
| A'' CH <sub>2</sub> twist | 209.6                 | 36   | 199.2  | 32   | 196.4                | 47   | 190.1  | 131  |
| A'' ScH OOP bend          | 99.7                  | 290  | 73.8   | 284  | 83.2                 | 163  | 98.4   | 85   |

<sup>a</sup>Frequencies and intensities computed with B3LYP or BPW91/6-311++G(3df, 3pd), and all electron basis is used for Sc. Frequencies and intensities are in cm<sup>-1</sup> and km/mol. CH<sub>2</sub>-ScHF has a C<sub>s</sub> (planar) structure, but CH<sub>2</sub>-YHF has a C<sub>1</sub> structure. The symmetry notations are based on the C<sub>s</sub> structure.

Table S3: Geometrical Parameters and Physical Constants Calculated for CH<sub>3</sub>-MX from reactions of Group 3 metals with Methyl Halide<sup>a</sup>

| Parameters                          | CH <sub>3</sub> -ScF | CH <sub>3</sub> -ScCl | CH <sub>3</sub> -ScBr | CH <sub>3</sub> -YF | CH <sub>3</sub> -YCl | CH <sub>3</sub> -YBr | CH <sub>3</sub> -LaF | CH <sub>3</sub> -LaCl | CH <sub>3</sub> -LaBr |
|-------------------------------------|----------------------|-----------------------|-----------------------|---------------------|----------------------|----------------------|----------------------|-----------------------|-----------------------|
| r(C-H <sub>1</sub> ) <sup>b</sup>   | 1.092                | 1.092                 | 1.093                 | 1.095               | 1.093                | 1.093                | 1.093                | 1.093                 | 1.093                 |
| r(C-H <sub>2</sub> )                | 1.097                | 1.097                 | 1.097                 | 1.097               | 1.098                | 1.099                | 1.100                | 1.100                 | 1.099                 |
| r(C-H <sub>3</sub> )                | 1.097                | 1.097                 | 1.097                 | 1.097               | 1.098                | 1.099                | 1.100                | 1.100                 | 1.099                 |
| r(C-M)                              | 2.169                | 2.166                 | 2.167                 | 2.333               | 2.321                | 2.319                | 2.441                | 2.417                 | 2.412                 |
| r(M-X)                              | 1.839                | 2.307                 | 2.471                 | 1.992               | 2.463                | 2.623                | 2.082                | 2.583                 | 2.753                 |
| r(M...H <sub>1</sub> )              | 2.780                | 2.789                 | 2.790                 | 2.909               | 2.951                | 2.960                | 3.093                | 3.064                 | 3.055                 |
| ∠H <sub>1</sub> CH <sub>2</sub>     | 108.0                | 107.8                 | 107.8                 | 107.2               | 107.4                | 107.4                | 107.5                | 107.6                 | 107.7                 |
| ∠H <sub>2</sub> CH <sub>3</sub>     | 107.7                | 107.8                 | 107.8                 | 107.1               | 107.1                | 107.0                | 107.2                | 107.4                 | 107.6                 |
| ∠CMX                                | 114.3                | 120.8                 | 122.3                 | 115.7               | 115.8                | 117.4                | 109.7                | 110.6                 | 111.2                 |
| ∠H <sub>1</sub> CM                  | 112.8                | 113.6                 | 113.7                 | 110.9               | 114.8                | 115.7                | 116.9                | 116.4                 | 116.1                 |
| ∠H <sub>2</sub> CM                  | 110.1                | 109.8                 | 109.9                 | 112.1               | 109.9                | 109.5                | 108.6                | 108.7                 | 108.8                 |
| Φ(H <sub>1</sub> CMH <sub>3</sub> ) | 120.7                | 120.8                 | 120.8                 | 119.8               | 121.2                | 121.5                | 121.9                | 121.7                 | 121.6                 |
| Φ(H <sub>1</sub> CMX)               | 0.0                  | 0.0                   | 0.0                   | 0.0                 | 0.0                  | 0.0                  | 0.0                  | 0.0                   | 0.0                   |
| Mol. Sym.                           | C <sub>s</sub>       | C <sub>s</sub>        | C <sub>s</sub>        | C <sub>s</sub>      | C <sub>s</sub>       | C <sub>s</sub>       | C <sub>s</sub>       | C <sub>s</sub>        | C <sub>s</sub>        |
| Q(C) <sup>c</sup>                   | -0.45                | -0.44                 | -0.47                 | -0.68               | -0.67                | -0.68                | -0.46                | -0.45                 | -0.47                 |
| Q(H <sub>1</sub> )                  | 0.00                 | 0.01                  | 0.01                  | 0.00                | 0.00                 | -0.02                | 0.05                 | 0.05                  | 0.05                  |
| Q(H <sub>2</sub> )                  | 0.01                 | 0.02                  | 0.01                  | -0.01               | -0.01                | 0.00                 | 0.01                 | 0.00                  | 0.01                  |
| Q(H <sub>3</sub> )                  | 0.01                 | 0.02                  | 0.01                  | -0.01               | -0.01                | 0.00                 | 0.01                 | 0.00                  | 0.01                  |
| Q(X)                                | -0.51                | -0.49                 | -0.40                 | -0.54               | -0.76                | -0.67                | -0.65                | -0.44                 | -0.37                 |
| Q(M)                                | 0.93                 | 0.89                  | 0.83                  | 1.23                | 1.44                 | 1.37                 | 1.056                | 0.84                  | 0.76                  |
| S(C) <sup>d</sup>                   | -0.054               | -0.041                | -0.026                | -0.041              | -0.037               | -0.023               | -0.119               | -0.136                | -0.110                |
| S(H <sub>1</sub> )                  | 0.018                | 0.018                 | 0.015                 | 0.030               | 0.031                | 0.027                | -0.015               | -0.009                | -0.011                |
| S(H <sub>2</sub> )                  | 0.009                | 0.006                 | 0.006                 | 0.033               | 0.038                | 0.033                | 0.023                | 0.024                 | 0.015                 |
| S(H <sub>3</sub> )                  | 0.009                | 0.006                 | 0.006                 | 0.033               | 0.038                | 0.033                | 0.023                | 0.024                 | 0.015                 |
| S(X)                                | -0.026               | 0.006                 | 0.045                 | -0.017              | 0.024                | 0.048                | 0.062                | -0.100                | -0.097                |
| S(M)                                | 1.044                | 1.005                 | 0.954                 | 0.961               | 0.907                | 0.82                 | 1.026                | 1.196                 | 1.189                 |

|                    |                 |                 |                 |                 |                 |                 |                 |                 |                 |
|--------------------|-----------------|-----------------|-----------------|-----------------|-----------------|-----------------|-----------------|-----------------|-----------------|
| $\mu^e$            | 2.94            | 3.64            | 3.81            | 2.93            | 3.45            | 3.53            | 3.43            | 4.29            | 4.47            |
| State <sup>f</sup> | <sup>2</sup> A' |
| $\Delta E^g$       | 94.1            | 86.1            | 79.2            | 99.5            | 91.7            | 90.6            | 110.0           | 102.3           | 101.3           |

<sup>a</sup>Calculations are carried out with B3LYP/6-311++G(3df, 3pd), and SDD core potential and basis set are used for Y and La while all electron basis is used for other atoms including Sc. <sup>b</sup>Bond lengths and angles are in Å and degrees. <sup>c</sup>Mulliken atomic charge. <sup>d</sup>Electron spin density. <sup>e</sup>Molecular dipole moment in D. <sup>f</sup>Electronic state. <sup>g</sup>Binding energies with respect to M + CH<sub>3</sub>X in kcal/mol.

Table S4: Geometrical Parameters and Physical Constants Calculated for CH<sub>2</sub>-MHX from reactions of Group 3 metals with Methyl Halide<sup>a</sup>

| Parameters                          | CH <sub>2</sub> -ScHF | CH <sub>2</sub> -ScHCl | CH <sub>2</sub> -ScHBr | CH <sub>2</sub> -YHF | CH <sub>2</sub> -YHCl | CH <sub>2</sub> -YHBr | CH <sub>2</sub> -LaHF | CH <sub>2</sub> -LaHCl | CH <sub>2</sub> -LaHBr |
|-------------------------------------|-----------------------|------------------------|------------------------|----------------------|-----------------------|-----------------------|-----------------------|------------------------|------------------------|
| r(C-H <sub>1</sub> ) <sup>b</sup>   | 1.095                 | 1.094                  | 1.094                  | 1.095                | 1.095                 | 1.095                 | 1.097                 | 1.097                  | 1.097                  |
| r(C-H <sub>2</sub> )                | 1.092                 | 1.092                  | 1.092                  | 1.093                | 1.093                 | 1.093                 | 1.095                 | 1.095                  | 1.095                  |
| r(C-M)                              | 2.156                 | 2.141                  | 2.138                  | 2.331                | 2.318                 | 2.316                 | 2.455                 | 2.431                  | 2.428                  |
| r(M-H <sub>3</sub> )                | 1.836                 | 1.820                  | 1.817                  | 2.003                | 1.989                 | 1.988                 | 2.134                 | 2.111                  | 2.108                  |
| r(M-X)                              | 1.846                 | 2.317                  | 2.479                  | 2.011                | 2.490                 | 2.650                 | 2.105                 | 2.617                  | 2.789                  |
| r(M...H <sub>1</sub> )              | 2.902                 | 2.883                  | 2.879                  | 3.082                | 3.066                 | 3.059                 | 3.204                 | 3.172                  | 3.171                  |
| ∠H <sub>1</sub> CH <sub>2</sub>     | 108.9                 | 109.3                  | 109.4                  | 108.0                | 108.2                 | 108.2                 | 107.7                 | 108.1                  | 108.2                  |
| ∠CMH <sub>3</sub>                   | 118.9                 | 116.1                  | 115.4                  | 115.5                | 115.0                 | 115.2                 | 110.1                 | 109.8                  | 110.6                  |
| ∠CMX                                | 120.0                 | 122.4                  | 122.5                  | 116.9                | 120.6                 | 122.2                 | 111.3                 | 112.7                  | 114.1                  |
| ∠H <sub>3</sub> MX                  | 121.0                 | 121.5                  | 122.0                  | 118.4                | 121.0                 | 122.6                 | 113.3                 | 114.4                  | 114.6                  |
| ∠H <sub>1</sub> CM                  | 123.1                 | 122.7                  | 122.6                  | 124.1                | 123.8                 | 123.5                 | 124.3                 | 123.5                  | 123.7                  |
| ∠H <sub>2</sub> CM                  | 128.1                 | 128.1                  | 128.0                  | 127.9                | 128.0                 | 128.3                 | 127.9                 | 128.3                  | 128.1                  |
| Φ(H <sub>1</sub> CMH <sub>3</sub> ) | 0.0                   | 0.0                    | 0.0                    | 19.3                 | 9.5                   | 0.0                   | 30.4                  | 23.4                   | 21.7                   |
| Φ(H <sub>1</sub> CMX)               | 180.0                 | 180.0                  | 180.0                  | 165.7                | 168.9                 | 180.0                 | 157.0                 | 152.1                  | 152.7                  |
| Mol. Sym.                           | C <sub>s</sub>        | C <sub>s</sub>         | C <sub>s</sub>         | C <sub>1</sub>       | C <sub>1</sub>        | C <sub>s</sub>        | C <sub>1</sub>        | C <sub>1</sub>         | C <sub>1</sub>         |

|                    |                  |                  |                  |                |                |                  |                |                |                |
|--------------------|------------------|------------------|------------------|----------------|----------------|------------------|----------------|----------------|----------------|
| Q(C) <sup>c</sup>  | -0.53            | -0.49            | -0.49            | -0.75          | -0.72          | -0.73            | -0.63          | -0.63          | -0.61          |
| Q(H <sub>1</sub> ) | 0.07             | 0.06             | 0.07             | 0.07           | 0.06           | 0.07             | 0.05           | 0.05           | 0.05           |
| Q(H <sub>2</sub> ) | 0.06             | 0.08             | 0.07             | 0.05           | 0.06           | 0.05             | 0.04           | 0.05           | 0.05           |
| Q(H <sub>3</sub> ) | -0.36            | -0.34            | -0.34            | -0.45          | -0.42          | -0.43            | -0.48          | -0.48          | -0.47          |
| Q(X)               | -0.54            | -0.47            | -0.35            | -0.57          | -0.74          | -0.68            | -0.63          | -0.57          | -0.49          |
| Q(M)               | 1.304            | 1.15             | 1.05             | 1.65           | 1.76           | 1.72             | 1.64           | 1.58           | 1.46           |
| S(C) <sup>d</sup>  | 0.944            | 0.940            | 0.936            | 0.955          | 0.949          | 0.946            | 0.961          | 0.951          | 0.948          |
| S(H <sub>1</sub> ) | -0.027           | -0.030           | -0.030           | -0.026         | -0.026         | -0.026           | -0.024         | -0.024         | -0.024         |
| S(H <sub>2</sub> ) | -0.026           | -0.024           | -0.024           | -0.023         | -0.023         | -0.023           | -0.022         | -0.021         | -0.021         |
| S(H <sub>3</sub> ) | 0.001            | 0.0007           | 0.0008           | 0.001          | 0.002          | 0.002            | 0.006          | 0.004          | 0.004          |
| S(X)               | -0.0009          | 0.0005           | -0.0013          | 0.001          | 0.002          | 0.001            | 0.001          | 0.003          | 0.004          |
| S(M)               | 0.109            | 0.112            | 0.117            | 0.092          | 0.095          | 0.100            | 0.077          | 0.087          | 0.089          |
| μ <sup>e</sup>     | 1.47             | 2.00             | 2.10             | 2.92           | 2.50           | 2.02             | 4.51           | 4.82           | 4.80           |
| State <sup>f</sup> | <sup>2</sup> A'' | <sup>2</sup> A'' | <sup>2</sup> A'' | <sup>2</sup> A | <sup>2</sup> A | <sup>2</sup> A'' | <sup>2</sup> A | <sup>2</sup> A | <sup>2</sup> A |
| ΔE <sup>g</sup>    | 70.0             | 60.9             | 59.1             | 73.0           | 66.3           | 65.4             | 82.8           | 75.9           | 75.2           |

<sup>a</sup>Calculations are carried out with B3LYP/6-311++G(3df, 3pd), and SDD core potential and basis set are used for Y and La while all electron basis is used for all other atoms including Sc. CH<sub>2</sub>-ScHX and CH<sub>2</sub>-LaHX have a planar (C<sub>s</sub>) and C<sub>1</sub> structure, respectively, at all level of theory used in this study, whereas CH<sub>2</sub>-YHX has a C<sub>1</sub> structure with B3LYP and BPW91, but a planar (C<sub>s</sub>) structure with MP2 and CCSD. <sup>b</sup>Bond lengths and angles are in Å and degrees. <sup>c</sup>Mulliken atomic charge. <sup>d</sup>Electron spin density. <sup>e</sup>Molecular dipole moment in D. <sup>f</sup>Electronic state. <sup>g</sup>Binding energies with respect to M + CH<sub>3</sub>X in kcal/mol.
